# Supplementary material for: Comparison Study of Small Extracellular Vesicle Isolation Methods for Profiling Protein Biomarkers in Breast Cancer Liquid Biopsies
Source: MDPI journal article supplement (doi:10.3390/ijms242015462), 2023-10-23
Supplement: s1 [file s1]

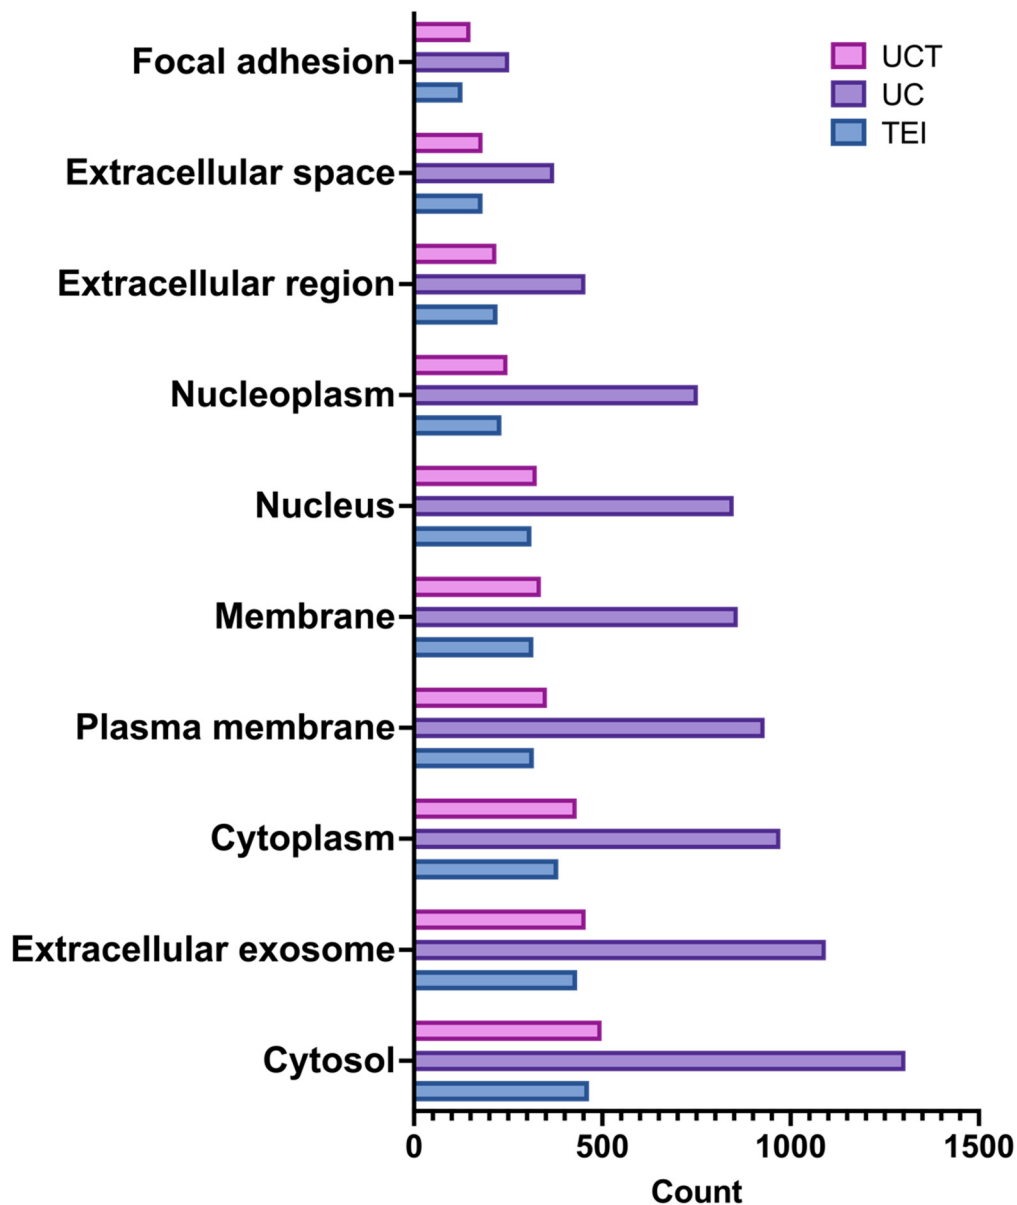

**Figure S1. Top 10 most abundant GO analysis term of identified proteins in MDA-MB-231 cell derived sEV isolates from three different isolation methods.** Go enrichment analysis of total identified protein isolated by TEI, UC, and UCT, isolation methods were carried out using DAVID. The graph shows 10 most abundant GO cellular component term and its count (P value<0.05, FDR<0.01). **Abbreviations:** TEI: total exosome isolation kit; UC: ultracentrifugation; UCT: ultracentrifugation followed by total exosome isolation kit.

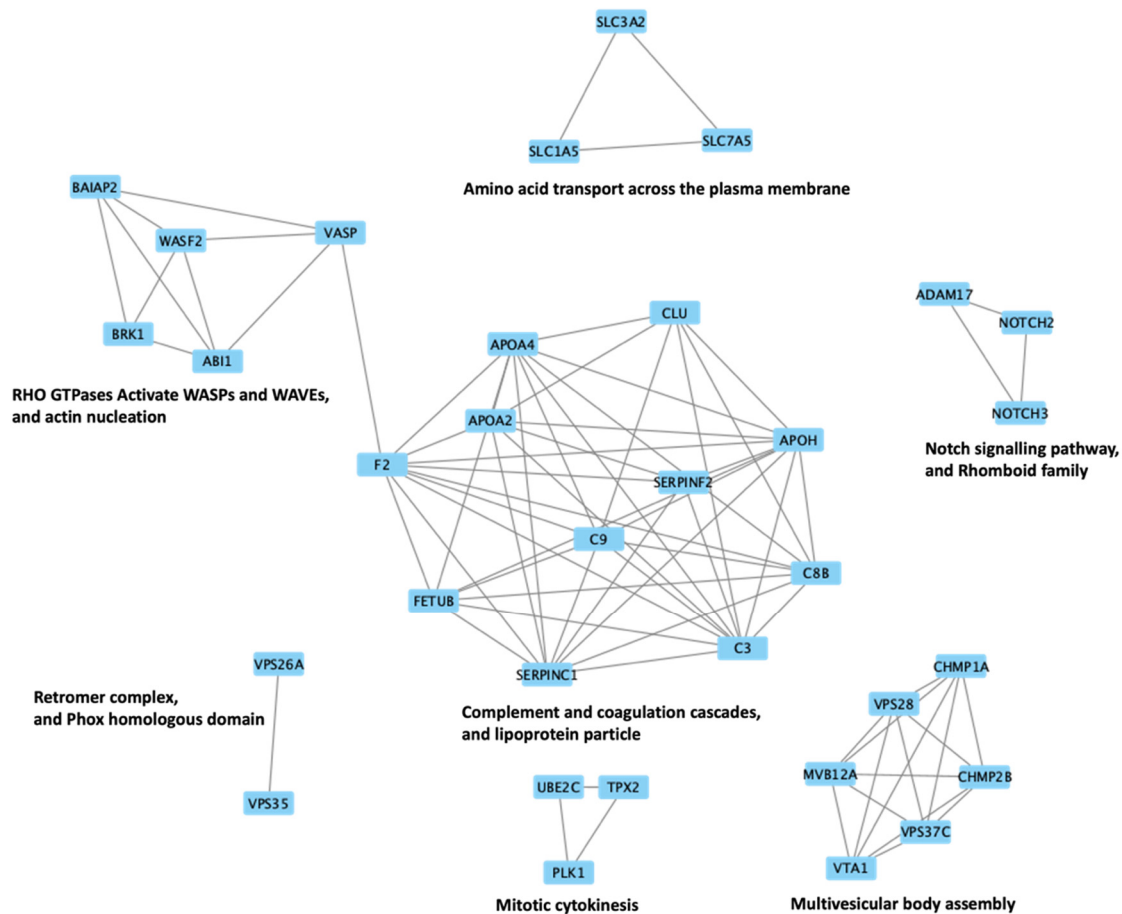

**Figure S2. STRING network analysis of upregulated and downregulated sEV proteins in BC cell lines by UC.** The figure shows the predicted sEV protein-protein interaction in BC cell lines and each cluster demonstrates its biological function (FDR=0.01).

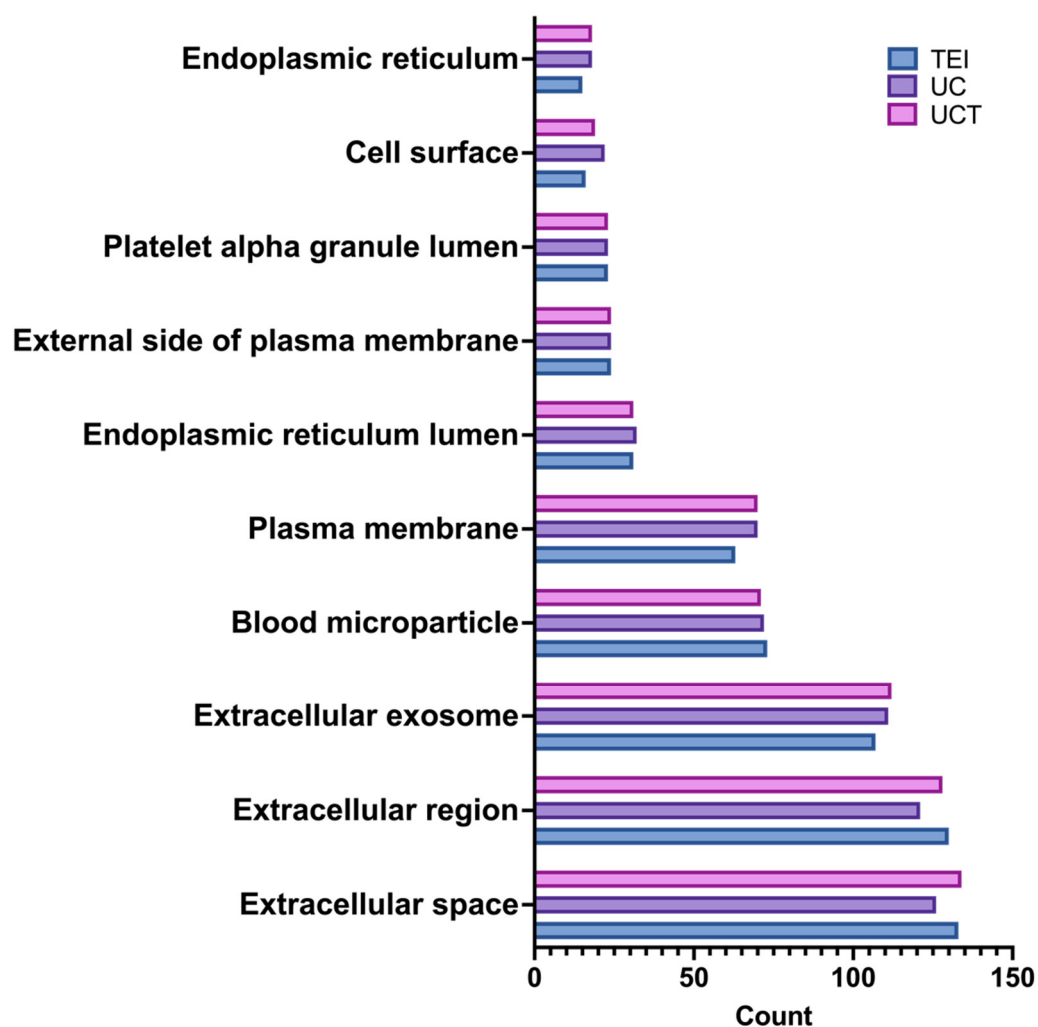

**Figure S3. Top 9 most abundant GO analysis term of identified proteins in BC plasma derived sEV isolates from three different isolation methods.** Go enrichment analysis of total identified protein isolated by UC, UCT, and TEI isolation methods were carried out using David. The graph shows 9 most abundant GO cellular component term and its count ( $P < 0.05$ ,  $FDR < 0.01$ ). **Abbreviations:** TEI: total exosome isolation kit; UC: ultracentrifugation; UCT: ultracentrifugation followed by total exosome isolation kit.



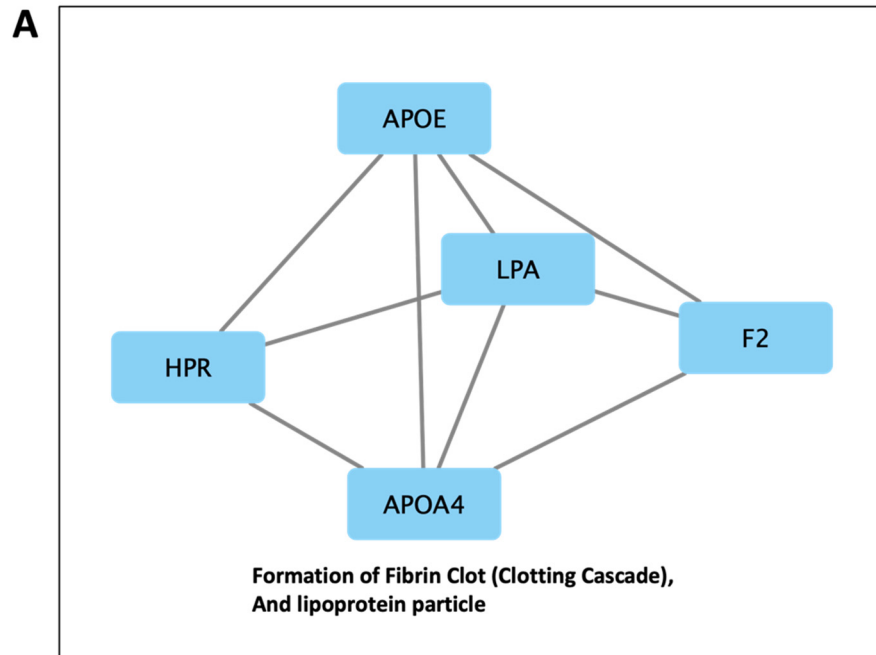

**UC**

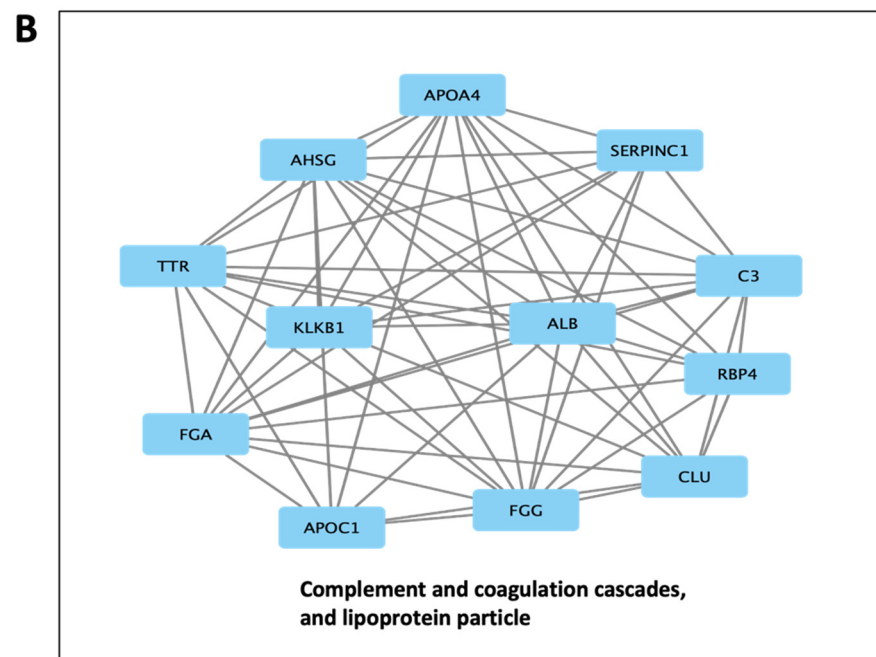

**UCT**

**Figure S5. STRING network analysis of upregulated and downregulated sEV proteins in BC plasma isolated by UC and UCT.** The figures represent the predicted sEV protein-protein interaction in BC plasma and each cluster demonstrates its biological function (FDR=0.01).

**Table S1. Top 10 significant GO terms for cellular component of identified proteins from MDA-MB-231 cell line**

| TEI                   |       |                         |                |           |
|-----------------------|-------|-------------------------|----------------|-----------|
| Cellular component    | Count | Percentage of genes (%) | <i>P</i> value | FDR       |
| Cytosol               | 465   | 54.4                    | 1.60E-69       | 3.60E-67  |
| Extracellular exosome | 433   | 50.7                    | 4.60E-200      | 3.10E-197 |
| Cytoplasm             | 383   | 44.8                    | 5.30E-30       | 4.40E-28  |
| Plasma membrane       | 318   | 37.2                    | 2.80E-14       | 8.80E-13  |
| Membrane              | 317   | 37.1                    | 1.10E-41       | 1.50E-39  |
| Nucleus               | 312   | 36.5                    | 5.40E-07       | 7.00E-06  |
| Nucleoplasm           | 232   | 27.2                    | 3.70E-09       | 7.50E-08  |
| Extracellular region  | 222   | 26                      | 4.40E-41       | 4.90E-39  |
| Extracellular space   | 182   | 21.3                    | 7.00E-27       | 5.20E-25  |
| Focal adhesion        | 129   | 15.1                    | 2.50E-75       | 8.20E-73  |
| UC                    |       |                         |                |           |
| Cellular component    | Count | Percentage of genes (%) | <i>P</i> value | FDR       |
| Cytosol               | 1305  | 51.7                    | 9.80E-185      | 4.70E-182 |
| Cytoplasm             | 1094  | 43.3                    | 6.90E-80       | 1.30E-77  |
| Extracellular exosome | 973   | 38.5                    | 0.00E+00       | 0.00E+00  |
| Nucleus               | 931   | 36.9                    | 1.20E-21       | 5.00E-20  |
| Plasma membrane       | 860   | 34.1                    | 1.40E-24       | 6.90E-23  |
| Membrane              | 849   | 33.6                    | 1.60E-92       | 3.70E-90  |
| Nucleoplasm           | 754   | 29.9                    | 2.30E-45       | 3.10E-43  |

| Extracellular region  | 455   | 18                      | 3.60E-38       | 3.80E-36  |
|-----------------------|-------|-------------------------|----------------|-----------|
| Extracellular space   | 372   | 14.7                    | 4.80E-21       | 1.80E-19  |
| Focal adhesion        | 253   | 10                      | 7.10E-122      | 2.20E-119 |
| UCT                   |       |                         |                |           |
| Cellular component    | Count | Percentage of genes (%) | <i>P</i> value | FDR       |
| Cytosol               | 498   | 55.1                    | 2.30E-76       | 5.30E-74  |
| Extracellular exosome | 456   | 50.5                    | 1.30E-209      | 9.10E-207 |
| Cytoplasm             | 432   | 47.8                    | 1.30E-41       | 1.50E-39  |
| Membrane              | 353   | 39.1                    | 4.20E-52       | 7.10E-50  |
| Nucleus               | 337   | 37.3                    | 2.40E-08       | 3.80E-07  |
| Plasma membrane       | 326   | 36.1                    | 2.20E-12       | 5.90E-11  |
| nucleoplasm           | 248   | 27.5                    | 5.00E-10       | 8.50E-09  |
| Extracellular region  | 219   | 24.3                    | 2.50E-35       | 2.20E-33  |
| Extracellular space   | 182   | 20.2                    | 9.60E-24       | 5.50E-22  |
| Focal adhesion        | 150   | 16.6                    | 5.40E-95       | 1.90E-92  |

**Table S2. Lipoprotein related cellular component in MDA-MB-231 cell line derived sEV proteins**

| Isolation method | Cellular component related to Lipoproteins | Count | Percentage of genes (%) | <i>P</i> value | FDR      |
|------------------|--------------------------------------------|-------|-------------------------|----------------|----------|
| TEI              | Chylomicron                                | 7     | 0.8                     | 1.10E-05       | 1.10E-04 |
|                  | Very-low-density lipoprotein               | 7     | 0.8                     | 1.50E-04       | 1.30E-03 |

|            |                                             |    |     |          |          |
|------------|---------------------------------------------|----|-----|----------|----------|
|            | Spherical high-density lipoprotein particle | 4  | 0.5 | 3.30E-03 | 1.90E-02 |
|            | High-density lipoprotein particle           | 5  | 0.6 | 2.30E-02 | 9.00E-02 |
| <i>UC</i>  | Very-low-density lipoprotein                | 13 | 0.5 | 1.00E-06 | 9.80E-06 |
|            | Chylomicron                                 | 10 | 0.4 | 6.30E-06 | 5.30E-05 |
|            | High-density lipoprotein particle           | 12 | 0.5 | 1.60E-04 | 1.00E-03 |
|            | Intermediate-density lipoprotein particle   | 5  | 0.2 | 9.70E-04 | 4.90E-03 |
|            | Spherical high-density lipoprotein particle | 6  | 0.2 | 1.10E-03 | 5.20E-03 |
|            | Low-density lipoprotein particle            | 6  | 0.2 | 1.40E-02 | 5.00E-02 |
|            |                                             |    |     |          |          |
| <i>UCT</i> | Chylomicron                                 | 7  | 0.8 | 1.50E-05 | 1.40E-04 |
|            | Very-low-density lipoprotein particle       | 7  | 0.8 | 2.10E-04 | 1.60E-03 |
|            | High-density lipoprotein particle           | 6  | 0.7 | 5.70E-03 | 2.90E-02 |
|            | Low-density lipoprotein particle            | 4  | 0.4 | 1.70E-02 | 7.10E-02 |



**Table S3. The most unique expressed sEV proteins in BC cell lines compared to normal breast cell.**

|        |      | MDA-MB-231/<br>Normal breast |           | MCF-7/<br>Normal breast |            | SK-BR-3/<br>Normal breast |           |
|--------|------|------------------------------|-----------|-------------------------|------------|---------------------------|-----------|
|        |      | Abundance Ratio (log2)       | P value   | Abundance Ratio (log2)  | P value    | Abundance Ratio (log2)    | P value   |
| CEBPZ  | Up   | 9.77                         | <0.000001 | 9.97                    | 6.03E-08   | 9.46                      | <0.000001 |
| CHMP1A | Up   | 3.49                         | 0.000565  | 4.49                    | 2.23E-05   | 2.73                      | 0.001111  |
| CLTA   | Up   | 7                            | 0.000264  | 6.99                    | 0.00024545 | 3.7                       | 0.007280  |
| IFITM1 | Up   | 9.97                         | 0.000020  | 9.97                    | 2.37E-06   | 9.97                      | 0.000016  |
| SEC13  | Up   | 7.69                         | 0.000006  | 8.05                    | 4.87E-06   | 7.4                       | 0.000013  |
| VTA1   | Up   | 7.87                         | 0.000603  | 7.96                    | 0.00052427 | 7.89                      | 0.000703  |
| BDH2   | Down | -8.11                        | 0.000717  | -8.35                   | 0.00029472 | -8.28                     | 0.000312  |
| INS    | Down | -9.97                        | <0.000001 | -9.97                   | 4.6098E-07 | -9.97                     | <0.000001 |
| LAMA3  | Down | -8.04                        | 0.000318  | -9.41                   | 0.00012396 | -9.39                     | 0.000095  |

|      |      |       |          |       |                |       |          |
|------|------|-------|----------|-------|----------------|-------|----------|
| TPX2 | Down | -8.03 | 0.008227 | -9.97 | 0.0004124<br>4 | -8.54 | 0.001329 |
|------|------|-------|----------|-------|----------------|-------|----------|

**Table S4. Top 9 significant GO terms for cellular component of identified proteins from BC patients' plasma.**

| TEI                              |       |                         |           |           |
|----------------------------------|-------|-------------------------|-----------|-----------|
| Cellular component               | Count | Percentage of genes (%) | P value   | FDR       |
| Extracellular space              | 133   | 81.1                    | 1.20E-105 | 1.10E-103 |
| Extracellular region             | 130   | 79.3                    | 4.90E-96  | 3.00E-94  |
| Extracellular exosome            | 107   | 65.2                    | 2.50E-62  | 1.20E-60  |
| Blood microparticle              | 73    | 44.5                    | 9.40E-118 | 1.70E-115 |
| Plasma membrane                  | 63    | 38.4                    | 4.30E-04  | 2.40E-03  |
| Endoplasmic reticulum lumen      | 31    | 18.9                    | 2.90E-24  | 8.90E-23  |
| External side of plasma membrane | 24    | 14.6                    | 4.80E-12  | 6.80E-11  |
| Platelet alpha granule lumen     | 23    | 14                      | 2.70E-30  | 1.00E-28  |
| Cell surface                     | 16    | 9.8                     | 1.70E-04  | 1.10E-03  |
| Endoplasmic reticulum            | 15    | 9.1                     | 7.00E-02  | 2.10E-01  |
| UC                               |       |                         |           |           |
| Cellular component               | Count | Percentage of genes (%) | P value   | FDR       |
| Extracellular space              | 126   | 71.6                    | 4.00E-88  | 4.60E-86  |
| Extracellular region             | 121   | 68.8                    | 6.70E-77  | 5.10E-75  |
| Extracellular exosome            | 111   | 63.1                    | 2.40E-62  | 1.30E-60  |
| Plasma membrane                  | 72    | 40.9                    | 1.50E-05  | 1.10E-04  |

|                                     |       |                            |           |           |
|-------------------------------------|-------|----------------------------|-----------|-----------|
| Blood microparticle                 | 70    | 39.8                       | 4.30E-108 | 9.70E-106 |
| Endoplasmic reticulum<br>Lumen      | 32    | 18.2                       | 1.60E-24  | 6.10E-23  |
| External side of plasma<br>Membrane | 24    | 13.6                       | 2.10E-11  | 5.40E-10  |
| Platelet alpha granule<br>lumen     | 23    | 13.1                       | 1.40E-29  | 6.30E-28  |
| Cell surface                        | 22    | 12.5                       | 1.20E-07  | 1.40E-06  |
| Endoplasmic reticulum               | 18    | 10.2                       | 1.80E-02  | 7.40E-02  |
| UCT                                 |       |                            |           |           |
| Cellular component                  | Count | Percentage of<br>genes (%) | P value   | FDR       |
| Extracellular space                 | 134   | 75.7                       | 3.40E-99  | 3.60E-97  |
| Extracellular region                | 128   | 72.3                       | 8.70E-86  | 6.10E-84  |
| Extracellular exosome               | 112   | 63.3                       | 3.90E-63  | 2.10E-61  |
| Plasma membrane                     | 71    | 40.1                       | 3.70E-05  | 2.70E-04  |
| Blood microparticle                 | 70    | 39.5                       | 7.00E-108 | 1.50E-105 |
| Endoplasmic reticulum<br>lumen      | 31    | 17.5                       | 3.00E-23  | 1.10E-21  |
| External side of plasma<br>membrane | 24    | 13.6                       | 2.40E-11  | 5.60E-10  |
| Platelet alpha granule<br>lumen     | 23    | 13                         | 1.60E-29  | 6.70E-28  |
| Cell surface                        | 19    | 10.7                       | 9.40E-06  | 7.90E-05  |
| Immunoglobulin complex              | 18    | 10.2                       | 6.40E-18  | 1.90E-16  |

**Table S5. Lipoprotein related cellular component of sEV proteins derived from BC patients' plasma.**

| Isolation<br>method | Cellular component related to<br>Lipoproteins | Count | Percentage<br>of genes<br>(%) | <i>P</i> value | FDR      |
|---------------------|-----------------------------------------------|-------|-------------------------------|----------------|----------|
| TEI                 | Very-low-density lipoprotein particle         | 9     | 5.5                           | 2.40E-12       | 4.10E-11 |
|                     | High-density lipoprotein particle             | 9     | 5.5                           | 2.50E-11       | 3.10E-10 |
|                     | Spherical high-density lipoprotein particle   | 7     | 4.3                           | 6.20E-12       | 8.20E-11 |
|                     | Intermediate-density lipoprotein particle     | 3     | 1.8                           | 6.10E-04       | 3.40E-03 |
|                     | Low-density lipoprotein particle              | 3     | 1.8                           | 4.60E-03       | 2.20E-02 |
|                     | Discoidal high-density lipoprotein particle   | 2     | 1.2                           | 1.60E-02       | 6.20E-02 |
|                     | Chylomicron                                   | 7     | 4.3                           | 6.40E-10       | 7.00E-09 |
| UC                  | Very-low-density lipoprotein particle         | 8     | 4.5                           | 3.00E-10       | 5.20E-09 |
|                     | High-density lipoprotein particle             | 8     | 4.5                           | 2.20E-09       | 3.10E-08 |
|                     | Spherical high-density lipoprotein particle   | 6     | 3.4                           | 2.30E-09       | 3.10E-08 |
|                     | Intermediate-density lipoprotein particle     | 3     | 1.7                           | 7.10E-04       | 4.10E-03 |
|                     | Chylomicron                                   | 7     | 4                             | 9.80E-10       | 1.50E-08 |

|     |                                             |   |     |          |          |
|-----|---------------------------------------------|---|-----|----------|----------|
| UCT | Very-low-density lipoprotein particle       | 8 | 4.5 | 3.10E-10 | 5.50E-09 |
|     | High-density lipoprotein particle           | 8 | 4.5 | 2.30E-09 | 2.90E-08 |
|     | Spherical high-density lipoprotein particle | 6 | 3.4 | 2.40E-09 | 2.90E-08 |
|     | Intermediate-density lipoprotein particle   | 3 | 1.7 | 7.10E-04 | 4.10E-03 |
|     | Chylomicron                                 | 7 | 4   | 1.00E-09 | 1.40E-08 |

**Table S6. GO analysis of distinctively expressed sEV proteins in BC plasma samples using UCT**

| CATEGORY         | TERM                                | COUNT | %          | PVALUE     | GENES                         | FDR        |
|------------------|-------------------------------------|-------|------------|------------|-------------------------------|------------|
| KEGG_PATHWAY     | Complement and coagulation cascades | 4     | 57.1428571 | 4.41E-06   | VTN, CFI, F13A1, C4BPA        | 5.74E-05   |
| REACTOME_PATHWAY | Regulation of Complement cascade    | 3     | 42.8571429 | 1.79E-04   | VTN, CFI, C4BPA               | 0.00423363 |
| REACTOME_PATHWAY | Complement cascade                  | 3     | 42.8571429 | 2.73E-04   | VTN, CFI, C4BPA               | 0.00423363 |
| REACTOME_PATHWAY | Immune System                       | 5     | 71.4285714 | 0.0049698  | VTN, CFI, F13A1, C4BPA, PRSS3 | 0.05135459 |
| REACTOME_PATHWAY | Innate Immune System                | 4     | 57.1428571 | 0.00798631 | VTN, CFI, C4BPA, PRSS3        | 0.06189393 |

**Table S7. GO analysis of distinctively expressed sEV proteins in BC plasma samples using UC.**

| CATEGORY         | TERM                                                                                                                        | COUNT | %          | PVALUE   | GENES                                                           | FDR        |
|------------------|-----------------------------------------------------------------------------------------------------------------------------|-------|------------|----------|-----------------------------------------------------------------|------------|
| REACTOME_PATHWAY | Platelet degranulation                                                                                                      | 8     | 24.2424242 | 1.08E-08 | TF, VWF, IGF2, FN1, FLNA, TAGLN2, A2M, THBS1                    | 2.02E-06   |
| REACTOME_PATHWAY | Response to elevated platelet cytosolic Ca2+                                                                                | 8     | 24.2424242 | 1.41E-08 | TF, VWF, IGF2, FN1, FLNA, TAGLN2, A2M, THBS1                    | 2.02E-06   |
| REACTOME_PATHWAY | Hemostasis                                                                                                                  | 11    | 33.3333333 | 4.83E-07 | SPN, TF, VWF, IGF2, FN1, FLNA, TAGLN2, A2M, THBS1, KLKB1, PF4V1 | 4.62E-05   |
| REACTOME_PATHWAY | Platelet activation, signalling and aggregation                                                                             | 8     | 24.2424242 | 1.42E-06 | TF, VWF, IGF2, FN1, FLNA, TAGLN2, A2M, THBS1                    | 1.02E-04   |
| REACTOME_PATHWAY | Regulation of Insulin-like Growth Factor (IGF) transport and uptake by Insulin-like Growth Factor Binding Proteins (IGFBPs) | 6     | 18.1818182 | 7.93E-06 | C3, TF, IGF2, FN1, APOL1, KTN1                                  | 4.55E-04   |
| KEGG_PATHWAY     | Complement and                                                                                                              | 5     | 15.1515152 | 5.88E-05 | C3, VWF, C9, A2M, KLKB1                                         | 0.00370256 |

|                      |                                                          |   |                |                |                                         |                |
|----------------------|----------------------------------------------------------|---|----------------|----------------|-----------------------------------------|----------------|
|                      | coagulation<br>cascades                                  |   |                |                |                                         |                |
| REACTOME_PATH<br>WAY | Formation of<br>Fibrin Clot<br>(Clotting<br>Cascade)     | 4 | 12.12121<br>21 | 9.11E-05       | VWF, A2M,<br>KLKB1, PF4V1               | 0.003962<br>36 |
| REACTOME_PATH<br>WAY | Post-<br>translational<br>protein<br>phosphorylati<br>on | 5 | 15.15151<br>52 | 9.66E-05       | C3, TF, FN1,<br>APOL1, KTN1             | 0.003962<br>36 |
| KEGG_PATHWAY         | Focal<br>adhesion                                        | 6 | 18.18181<br>82 | 1.24E-04       | COMP, VWF,<br>FN1, ZYX,<br>FLNA, THBS1  | 0.003907<br>62 |
| REACTOME_PATH<br>WAY | Extracellular<br>matrix<br>organization                  | 6 | 18.18181<br>82 | 5.06E-04       | COMP, VWF,<br>FN1, A2M,<br>THBS1, KLKB1 | 0.018157<br>43 |
| REACTOME_PATH<br>WAY | Integrin cell<br>surface<br>interactions                 | 4 | 12.12121<br>21 | 9.19E-04       | COMP, VWF,<br>FN1, THBS1                | 0.029296<br>98 |
| REACTOME_PATH<br>WAY | Intrinsic<br>Pathway of<br>Fibrin Clot<br>Formation      | 3 | 9.090909<br>09 | 0.001230<br>35 | VWF, A2M,<br>KLKB1                      | 0.035310<br>94 |
| KEGG_PATHWAY         | ECM-receptor<br>interaction                              | 4 | 12.12121<br>21 | 0.001378<br>8  | COMP, VWF,<br>FN1, THBS1                | 0.028954<br>86 |
| REACTOME_PATH<br>WAY | Complement<br>cascade                                    | 3 | 9.090909<br>09 | 0.007655<br>19 | C3, FCN3, C9                            | 0.199730<br>96 |
| KEGG_PATHWAY         | signalling<br>pathway                                    | 5 | 15.15151<br>52 | 0.011381<br>74 | COMP, VWF,<br>IGF2, FN1,<br>THBS1       | 0.179262<br>33 |
| KEGG_PATHWAY         | Proteoglycans<br>in cancer                               | 4 | 12.12121<br>21 | 0.014668<br>86 | IGF2, FN1,<br>FLNA, THBS1               | 0.184827<br>67 |

|                      |                                                                                                   |   |                |                |                                                        |                |
|----------------------|---------------------------------------------------------------------------------------------------|---|----------------|----------------|--------------------------------------------------------|----------------|
| REACTOME_PATH<br>WAY | GP1b-IX-V<br>activation<br>signalling                                                             | 2 | 6.060606<br>06 | 0.027079<br>04 | VWF, FLNA                                              | 0.551493<br>47 |
| REACTOME_PATH<br>WAY | Scavenging of<br>heme from<br>plasma                                                              | 2 | 6.060606<br>06 | 0.029303<br>57 | HP, APOL1                                              | 0.551493<br>47 |
| REACTOME_PATH<br>WAY | GRB2:SOS<br>provides<br>linkage to<br>MAPK<br>signalling for<br>Integrins                         | 2 | 6.060606<br>06 | 0.033737<br>99 | VWF, FN1                                               | 0.551493<br>47 |
| REACTOME_PATH<br>WAY | p130Cas<br>linkage to<br>MAPK<br>signalling for<br>integrins                                      | 2 | 6.060606<br>06 | 0.033737<br>99 | VWF, FN1                                               | 0.551493<br>47 |
| REACTOME_PATH<br>WAY | Diseases of<br>hemostasis                                                                         | 2 | 6.060606<br>06 | 0.035947<br>9  | VWF, KLKB1                                             | 0.551493<br>47 |
| REACTOME_PATH<br>WAY | Defects of<br>contact<br>activation<br>system (CAS)<br>and<br>kallikrein/kinin<br>system<br>(KKS) | 2 | 6.060606<br>06 | 0.035947<br>9  | VWF, KLKB1                                             | 0.551493<br>47 |
| REACTOME_PATH<br>WAY | Post-<br>translational<br>protein<br>modification                                                 | 8 | 24.24242<br>42 | 0.037937<br>85 | C3, TF, PSMA1,<br>DCTN2, FN1,<br>APOL1, THBS1,<br>KTN1 | 0.551493<br>47 |
| REACTOME_PATH<br>WAY | Cell surface<br>interactions at<br>the vascular<br>wall                                           | 3 | 9.090909<br>09 | 0.038665<br>2  | SPN, FN1,<br>PF4V1                                     | 0.551493<br>47 |



|                  |                                                 |   |            |            |                                                     |            |
|------------------|-------------------------------------------------|---|------------|------------|-----------------------------------------------------|------------|
| REACTOME_PATHWAY | Degradation of the extracellular matrix         | 3 | 9.09090909 | 0.04021658 | FN1, A2M, KLKB1                                     | 0.55149347 |
| REACTOME_PATHWAY | Cell-extracellular matrix interactions          | 2 | 6.06060606 | 0.04035318 | FLNA, LIMS1                                         | 0.55149347 |
| KEGG_PATHWAY     | hsa05165:Human papillomavirus infection         | 4 | 12.1212121 | 0.05051978 | COMP, VWF, FN1, THBS1                               | 0.51205955 |
| REACTOME_PATHWAY | Initial triggering of complement                | 2 | 6.06060606 | 0.05128199 | C3, FCN3                                            | 0.66899686 |
| KEGG_PATHWAY     | Phagosome                                       | 3 | 9.09090909 | 0.05689551 | C3, COMP, THBS1                                     | 0.51205955 |
| REACTOME_PATHWAY | Syndecan interactions                           | 2 | 6.06060606 | 0.05993891 | FN1, THBS1                                          | 0.71676945 |
| REACTOME_PATHWAY | Integrin signalling                             | 2 | 6.06060606 | 0.05993891 | VWF, FN1                                            | 0.71676945 |
| REACTOME_PATHWAY | Metabolism of proteins                          | 9 | 27.2727273 | 0.06580889 | C3, TF, PSMA1, DCTN2, IGF2, FN1, APOL1, THBS1, KTN1 | 0.75548611 |
| REACTOME_PATHWAY | Immune System                                   | 9 | 27.2727273 | 0.07515349 | C3, PI3R, FCN3, PSMA1, DCTN2, C9, HP, FN1, FLNA     | 0.79195136 |
| REACTOME_PATHWAY | Signalling by high-kinase activity BRAF mutants | 2 | 6.06060606 | 0.07914058 | VWF, FN1                                            | 0.79195136 |

|                      |                                                                  |   |                |                |                                  |                |
|----------------------|------------------------------------------------------------------|---|----------------|----------------|----------------------------------|----------------|
| REACTOME_PATH<br>WAY | Platelet<br>Aggregation<br>(Plug<br>Formation)                   | 2 | 6.060606<br>06 | 0.085457<br>04 | VWF, FN1                         | 0.791951<br>36 |
| REACTOME_PATH<br>WAY | MAP2K and<br>MAPK<br>activation                                  | 2 | 6.060606<br>06 | 0.087553<br>27 | VWF, FN1                         | 0.791951<br>36 |
| REACTOME_PATH<br>WAY | ~Innate<br>Immune<br>System                                      | 6 | 18.18181<br>82 | 0.090363<br>5  | C3, PIGR, FCN3,<br>PSMA1, C9, HP | 0.791951<br>36 |
| REACTOME_PATH<br>WAY | Binding and<br>Uptake of<br>Ligands by<br>Scavenger<br>Receptors | 2 | 6.060606<br>06 | 0.091731<br>9  | HP, APOL1                        | 0.791951<br>36 |
| REACTOME_PATH<br>WAY | Signalling by<br>RAF1<br>mutants                                 | 2 | 6.060606<br>06 | 0.093814<br>32 | VWF, FN1                         | 0.791951<br>36 |

**Table S8. Potential sEV protein biomarker isolated by UC method.**

| POTENTIAL<br>SEV<br>BIOMARKERS | EXPRESSION<br>IN BC PLASMA | ABUNDANCE RATIO<br>(LOG2): BC/NON-CANCER | P VALUE     |
|--------------------------------|----------------------------|------------------------------------------|-------------|
| <b>KRT10</b>                   | Upregulation               | 1.44                                     | 0.046483305 |
| <b>STOM</b>                    | Upregulation               | 2.22                                     | 0.010063307 |
| <b>F2</b>                      | Upregulation               | 2.16                                     | 0.012802556 |
| <b>F5</b>                      | Upregulation               | 2.11                                     | 0.027789899 |
| <b>TUBB1</b>                   | Upregulation               | 2.49                                     | 0.041497799 |
| <b>HPR</b>                     | Upregulation               | 3.87                                     | 0.034695762 |

|               |                |       |             |
|---------------|----------------|-------|-------------|
| <b>ITIH1</b>  | Upregulation   | 2.83  | 0.033002719 |
| <b>GP1BB</b>  | Upregulation   | 1.12  | 0.021107319 |
| <b>IGHA1</b>  | Upregulation   | 4.65  | 0.000467739 |
| <b>IGHG4</b>  | Upregulation   | 2.19  | 0.001960026 |
| <b>LPA</b>    | Upregulation   | 3     | 0.029432023 |
| <b>APOA4</b>  | Downregulation | -3.31 | 0.004124821 |
| <b>APOE</b>   | Downregulation | -1.97 | 0.005521731 |
| <b>CSN1S1</b> | Downregulation | -0.9  | 0.005749587 |

**Table S9. Potential sEV protein biomarker isolated by UCT method.**

| <b>POTENTIAL<br/>SEV<br/>BIOMARKERS</b> | <b>EXPRESSION<br/>IN BC PLASMA</b> | <b>ABUNDANCE RATIO<br/>(LOG2): BC/NON-CANCER</b> | <b>P VALUE</b> |
|-----------------------------------------|------------------------------------|--------------------------------------------------|----------------|
| <b>AHSG</b>                             | Upregulation                       | 2.34                                             | 0.030585       |
| <b>ALB</b>                              | Upregulation                       | 3.25                                             | 0.022753       |
| <b>COL1A1</b>                           | Upregulation                       | 2.97                                             | 0.030104       |
| <b>CSN1S1</b>                           | Upregulation                       | 2.55                                             | 0.031649       |
|                                         |                                    | 3.06                                             | 0.02753        |
|                                         |                                    | 2.78                                             | 0.03789        |
|                                         |                                    | 3.62                                             | 0.033101       |
| <b>EEF1A2</b>                           | Upregulation                       | 5.32                                             | 0.013567       |
| <b>KRT9</b>                             | Upregulation                       | 1.75                                             | 0.031303       |

|                 |                |       |            |
|-----------------|----------------|-------|------------|
| <b>RPL3</b>     | Upregulation   | 2.54  | 0.019181   |
| <b>APOA4</b>    | Downregulation | -2.37 | 0.01328465 |
| <b>APOC1</b>    | Downregulation | -2.7  | 0.04784891 |
| <b>C1S</b>      | Downregulation | -4.54 | 0.00111333 |
| <b>C3</b>       | Downregulation | -2.45 | 0.01899849 |
| <b>C5</b>       | Downregulation | -4.47 | 0.04643546 |
| <b>C7</b>       | Downregulation | -2.88 | 0.00067045 |
| <b>C8G</b>      | Downregulation | -1.55 | 0.00031382 |
| <b>CFHR2</b>    | Downregulation | -3.48 | 0.03053928 |
| <b>CLU</b>      | Downregulation | -1.52 | 0.01986562 |
| <b>FGA</b>      | Downregulation | -1.5  | 0.03166746 |
| <b>FGG</b>      | Downregulation | -2.63 | 0.02426461 |
| <b>ITIH1</b>    | Downregulation | -1.98 | 0.00189802 |
| <b>KLKB1</b>    | Downregulation | -2.05 | 0.03297687 |
| <b>RBP4</b>     | Downregulation | -0.94 | 0.04068649 |
| <b>SERPINC1</b> | Downregulation | -1.82 | 0.01121957 |
| <b>TTR</b>      | Downregulation | -1.37 | 0.03719059 |
